# Supplementary material
Source: PubMed Central journal article supplement (PMC2904426)

1  
2  
3 sites occupied. Here,  $K_H$  and  $K_{Cl}$  are the equilibrium constant for binding of  $H^+$  and  $Cl^-$ ,  
4  
5 respectively.  $f$  is a scale factor  
6  
7  
8  
9

10 **Fig. 8** *Simulation of  $I_{ClVol}$  time course and ion-dependence of  $I_{ClVol}$  decay.* **a** Time course  
11 of  $I_{ClVol}$  between -80 and +120 mV was simulated using the model shown in Fig. 7 and  
12 the rate constants listed in Table 2. **b** FIC vs  $V_m$  curves as a function of  $[Cl^-]_i$  (25, 70, 140  
13 and 200mM) were also simulated. Continuous lines are fits with equation 2 using  $z=1.43$ .  
14  
15 **c** and **d**: Simulations of FIC vs  $V_m$  as a function of  $pH_e$  (5.5, 7.3, and 9.0) and  $[Cl^-]_i$  (140  
16 mM, c or 25 mM, d). Continuous lines are fits with equation 2 using  $z=1.53$  and 1.44 for  
17 140 and 25 mM  $[Cl^-]_i$ , respectively  
18  
19  
20  
21  
22  
23  
24  
25  
26  
27  
28

29 **Supplemental Fig. 9** *Hypothetical  $V_m$ -dependence of volume-sensitive chloride channels.*

30 **a** Simple barrier model representing the energy landscape along the VRAC pore. This  
31 energy profile plus the kinetic model shown in Fig. 7 were used to qualitatively explain  
32 the  $V_m$ - (panel a) and external  $Cl^-$ -dependence (panel b) of inactivation. The energy  
33 profiles depict the landscape along the pore that the permeant anions (with symmetrical  
34  $[Cl^-]_i=[Cl^-]_e=140$  mM) experiment at -100, 0 and +100 mV. At each voltage the pore  
35 occupancy changes and thus the probability that the pore is empty ( $P_U$ ) is greater at  
36 positive voltages. Moreover,  $P_U$  changes as a function of the  $Cl^-$  gradient across the  
37 membrane. **b**  $P_U$  becomes larger as the  $Cl^-$  gradient decreases.  $P_U$  was calculated using  
38 the  $V_m$ -dependent rate constants:  $\alpha_V=[Cl^-]_o*k_1+[Cl^-]_i*k_2$  and  $\beta_V=k_{-1+}*k_2$  recorded in  
39 Table 2  
40  
41  
42  
43  
44  
45  
46  
47  
48  
49  
50  
51  
52  
53  
54  
55  
56  
57  
58  
59  
60

Fig. 9

1  
2  
3  
4  
5  
6  
7  
8  
9  
10  
11  
12  
13  
14  
15  
16  
17  
18  
19  
20  
21  
22  
23  
24  
25  
26  
27  
28  
29  
30  
31  
32  
33  
34  
35  
36  
37  
38  
39  
40  
41  
42  
43  
44  
45  
46  
47  
48  
49

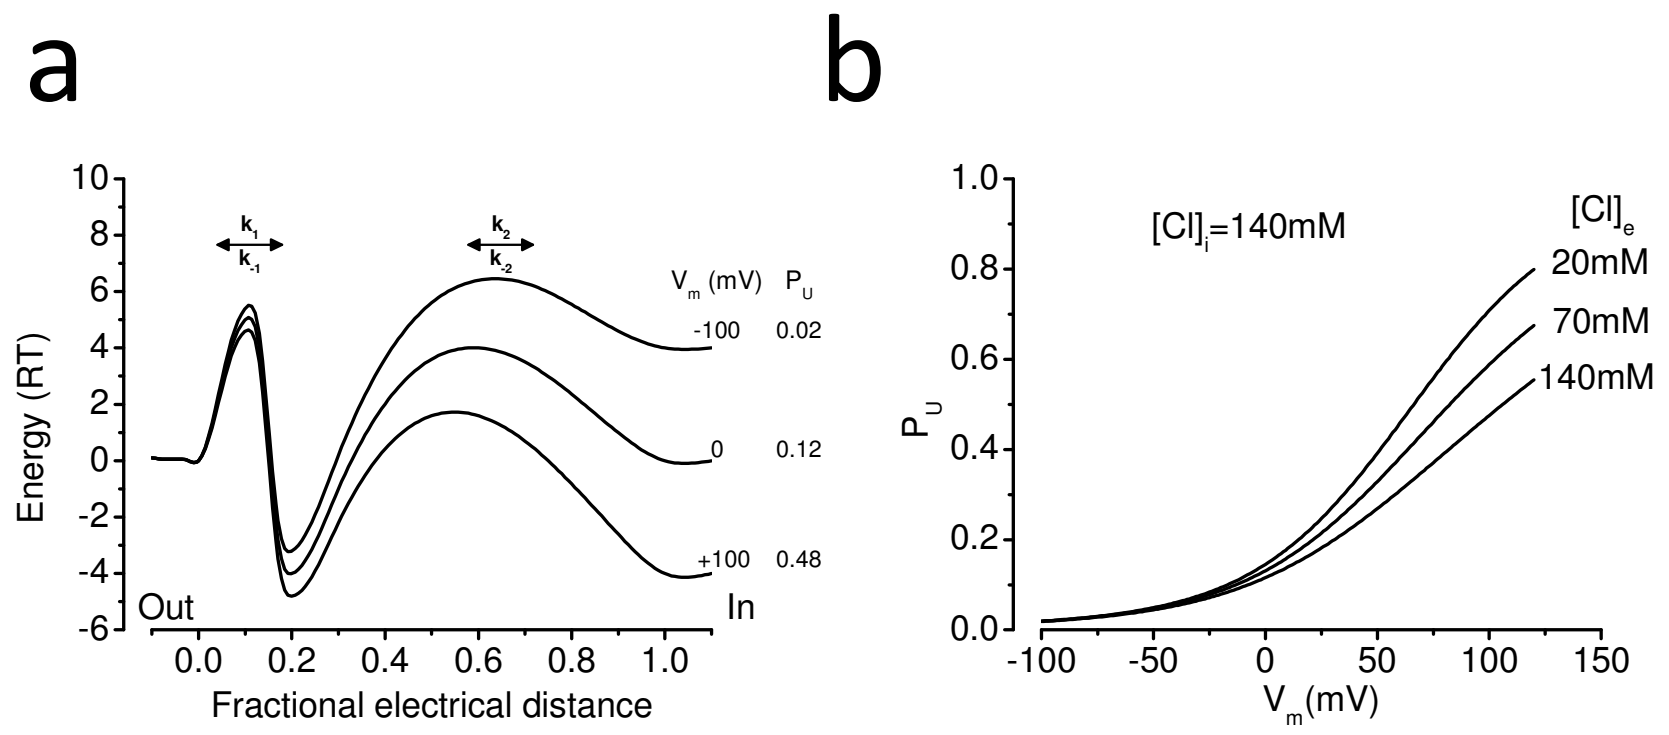

Supplement: NIHMS198285-supplement-supplement_1.pdf [file NIHMS198285-supplement-supplement_1.pdf]
